# Supplementary material for: Optimization of external (in air) particle induced gamma-ray emission (PIGE) methodology for rapid, non-destructive, and simultaneous quantification of fluorine, sodium, and phosphorus in nuclear waste immobilization matrices
Source: Royal Society of Chemistry journal article supplement (doi:10.1039/d2ra06163e), 2022-01-01
Supplement: d2ra06163e1.pdf [file d2ra06163e1.pdf]

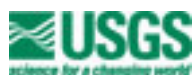

# United States Geological Survey Certificate of Analysis

## Granite, G-2

Material was collected from the Sullivan quarry near Near Bradford, Rhode Island, which is approximately three miles east of the site where G-1 was collected. The material was collected by Felix Chayes, Geophysical Laboratory, Carnegie Institution.

Element concentrations were determined by cooperating laboratories using a variety of analytical methods. Certificate values are based primarily on international data compilations (Gladney, et al. 1992, Govindaraju, K., 1989, Govindaraju, 1994). USGS reports (Flanagan, F.J., 1969, Flanagan, 1976) provide background information on this material.

### Recommended values

| Element                          | Wt %  | ±    | Oxide                         | Wt %  | ±    |
|----------------------------------|-------|------|-------------------------------|-------|------|
| Al <sub>2</sub> O <sub>3</sub>   | 15.39 | 0.30 | MgO                           | 0.75  | 0.03 |
| CaO                              | 1.96  | 0.08 | MnO                           | 0.03  | 0.01 |
| Fe <sub>2</sub> O <sub>3</sub>   | 1.07  | 0.14 | Na <sub>2</sub> O             | 4.08  | 0.13 |
| FeO                              | 1.46  | 0.08 | P <sub>2</sub> O <sub>5</sub> | 0.14  | 0.01 |
| Fe <sub>2</sub> O <sub>3</sub> T | 2.66  | 0.17 | SiO <sub>2</sub>              | 69.14 | 0.3  |
| K <sub>2</sub> O                 | 4.48  | 0.13 | TiO <sub>2</sub>              | 0.48  | 0.03 |

| Element | µg/g | ±    | Element | µg/g | ±   | Element | µg/g | ±   |
|---------|------|------|---------|------|-----|---------|------|-----|
| Ba      | 1880 | 23   | Ga      | 23   | 2   | Sm      | 7.2  | 0.7 |
| Be      | 2.5  | 0.4  | Hf      | 7.9  | 0.7 | Sr      | 478  | 2   |
| Ce      | 160  | 10   | La      | 89   | 8   | Th      | 25   | 2   |
| Co      | 4.6  | 0.7  | Li      | 34   | 4   | V       | 36   | 4   |
| Cs      | 1.34 | 0.16 | Nd      | 55   | 6   | Y       | 11   | 2   |
| Dy      | 2.4  | 0.3  | Pb      | 30   | 4   | Yb      | 0.8  | 0.2 |
| Eu      | 1.4  | 0.12 | Rb      | 170  | 3   | Zn      | 86   | 8   |
| F       | 1280 | 80   | Sc      | 3.5  | 0.4 | Zr      | 309  | 35  |

### Information values

| Element | µg/g | Element          | µg/g | Element | µg/g |
|---------|------|------------------|------|---------|------|
| As      | 0.25 | Gd               | 4.3  | Se      | 0.07 |
| B       | 2.4  | Ho               | 0.4  | Ta      | 0.5  |
| Bi      | 0.04 | Lu               | 0.11 | Tb      | 0.48 |
| Cl      | 70   | Nb               | 12   | Tm      | 0.18 |
| Cu      | 11   | Pr               | 18   | W       | 0.2  |
| Er      | 0.92 | S <sub>tot</sub> | 100  |         |      |

Denver, Colorado  
revised March 1998

David B. Smith  
Branch of Geochemistry

## **Bibliography**

Flanagan, F.J., 1969, U.S. Geological Survey silicate rock standards, *Geochimica et Cosmochimica Acta*, v. 31, p. 289-308

Flanagan, F.J., 1976, Descriptions and Analysis of Eight New USGS Rock Standards, Geological Survey Professional Paper 840, 192 p.

Gladney, E.S., Jones, E.A., Nickell, E.J., and Roelandts, I., 1992, 1988 Compilation of elemental concentration data for USGS AGV-1, GSP-1 and G-2, *Geostandards Newsletter*, v. 16, p. 111-300.

Govindaraju, K., 1989, 1989 Compilation of working values and sample description of 272 geostandards, *Geostandards Newsletter*, v. 13, p. 1-113

Govindaraju, K., 1994, 1994 Compilation of working values and description for 383 geostandards, *Geostandards Newsletter*, v. 18, p. 1-158

## **Notes**

Unless otherwise indicated total element concentrations are reported for material on an as-received basis, i.e., no drying.

### **Drying instructions**

Certificate values are based on analyses performed on an as-received basis, i.e., drying is not required.

## **Ordering Information**

This reference material is no longer available.

Dr. Stephen A. Wilson  
U.S. Geological Survey  
Box 25046, MS 964  
Denver, CO 80225

Tel: 303-236-2454  
FAX: 303-236-3200 or 303-236-1425  
e-mail: [swilson@usgs.gov](mailto:swilson@usgs.gov)

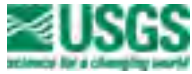

# United States Geological Survey Certificate of Analysis

## Syenite STM-1

A sample of peralkaline nepheline syenite was collected from a sill that underlies Table Mountain which is approximately 60 km WNW of Eugene, Oregon. The rock sample was light to medium gray and had a glassy luster. The material was holocrystalline and very fine to fine grained, having a very pronounced trachytic texture (Flanagan, 1976).

Element concentrations were determined by cooperating laboratories using a variety of analytical methods. Certificate values are based primarily on international data compilations (Abbey, 1983; Gladney and Roelandts, 1988; Govindaraju, 1994). Initial USGS studies (Flanagan, 1976) provide background information on this material.

### Recommended values

| Oxide                            | Wt % | ±    | Oxide                         | Wt % | ±    |
|----------------------------------|------|------|-------------------------------|------|------|
| SiO <sub>2</sub>                 | 59.6 | 0.49 | CaO                           | 1.09 | 0.06 |
| Al <sub>2</sub> O <sub>3</sub>   | 18.4 | 0.23 | MgO                           | 0.10 | 0.02 |
| Fe <sub>2</sub> O <sub>3</sub>   | 2.87 | 0.02 | Na <sub>2</sub> O             | 8.94 | 0.20 |
| FeO                              | 2.09 | 0.03 | K <sub>2</sub> O              | 4.28 | 0.07 |
| Fe <sub>2</sub> O <sub>3</sub> T | 5.22 | 0.1  | P <sub>2</sub> O <sub>5</sub> | 0.16 | 0.01 |
|                                  |      |      | TiO <sub>2</sub>              | 0.14 | 0.01 |

| Element | µg/g | ±   | Element | µg/g | ±    | Element | µg/g | ±   |
|---------|------|-----|---------|------|------|---------|------|-----|
| Ba      | 560  | 60  | Gd      | 9.5  | 0.8  | Sm      | 13   | 1   |
| Be      | 9.6  | 0.6 | Hf      | 28   | 2    | Sr      | 700  | 30  |
| Ce      | 260  | 18  | La      | 150  | 6    | Ta      | 19   | 1.2 |
| Cl      | 460  | 40  | Mn      | 1700 | 120  | Tb      | 1.6  | 0.2 |
| Cs      | 1.5  | 0.1 | Nb      | 270  | 12   | Th      | 31   | 3   |
| Dy      | 8.1  | 0.5 | Nd      | 79   | 7    | U       | 9.1  | 0.1 |
| Er      | 4.2  | 0.4 | Pb      | 18   | 1.8  | Y       | 46   | 5   |
| Eu      | 3.6  | 0.3 | Rb      | 118  | 6    | Yb      | 4.4  | 0.4 |
| F       | 910  | 50  | Sb      | 1.7  | 0.2  | Zn      | 235  | 22  |
| Ga      | 35   | 5   | Sc      | 0.61 | 0.07 | Zr      | 1210 | 120 |

| Element | µg/g | Element | µg/g | Element          | µg/g |
|---------|------|---------|------|------------------|------|
| Ag      | 0.08 | Co      | 0.9  | Ni               | 3    |
| As      | 4.6  | Cr      | 4.3  | S <sub>tot</sub> | 43   |
| B       | 6.4  | Cu      | 4.6  | Sn               | 6.8  |
| Bi      | 0.13 | Li      | 32   | Tm               | 0.7  |
| Cd      | 0.27 | Mo      | 5.2  | V                | 8.7  |

Denver, Colorado  
revised March 1995

David B. Smith  
Branch of Geochemistry

## Glossary

|                                 |                                                                                         |
|---------------------------------|-----------------------------------------------------------------------------------------|
| $\text{Fe}_2\text{O}_3\text{T}$ | Total iron expressed as $\text{Fe}_2\text{O}_3$                                         |
| $\text{S}_{\text{tot}}$         | Total concentration of sulfur                                                           |
| Wt %                            | Percent of total element concentration                                                  |
| $\mu\text{g/g}$                 | Total element concentration expressed as micrograms of element per gram of solid sample |
| $\pm$                           | One standard deviation                                                                  |

## Notes

Unless otherwise indicated total element concentrations are reported for material on an as-received basis, i.e., no drying.

## Ordering Information

This reference material is no longer available.

Dr. Stephen A. Wilson  
U.S. Geological Survey  
Box 25046, MS 964  
Denver, CO 80225

Tel: 303-236-2454  
FAX: 303-236-3200 or 303-236-1425  
e-mail: [swilson@usgs.gov](mailto:swilson@usgs.gov)

---
